# Supplementary material
Source: publisher figshare collection journal article supplement (https://sage.figshare.com/ndownloader/files/34836368)
Supplement: Supplementary file 1 [file 34836368]

**Supplementary file 1: Missing data**

Title: Health-related quality of life in patients with recurrent *Clostridioides difficile*infections

Journal: Therapeutic Advances in Gastroenterology

Authors: Lianna H Hammeken, Simon M D Baunwall, Jens F Dahlerup, Christian L Hvas, Lars H Ehlers

Corresponding author: Lianna H Hammeken. Email: lhham@dcm.aau.dk

**Table 1.** Distributions of missing data.

| **Description of variables** | **Missing values, n (%)** | | | | **Imputed** |
| --- | --- | --- | --- | --- | --- |
|  | **FMT  (n=24)** | **Fidaxomicin (n=24)** | **Vancomycin**  **(n=16)** | **Total (n=64)** |  |
| **Baseline** | | | | | |
| Age (ageyrs) | 0 (0 %) | 0 (0 %) | 0 (0 %) | 0 (0 %) |  |
| Gender (b1_gender) | 0 (0 %) | 0 (0 %) | 0 (0 %) | 0 (0 %) |  |
| Charlson comorbidity index | 0 (0 %) | 0 (0 %) | 0 (0 %) | 0 (0 %) |  |
| WHO performance score (b1_who) | 0 (0 %) | 0 (0 %) | 0 (0 %) | 0 (0 %) |  |
| Number of previous CDIs (b1_cdicount) | 0 (0 %) | 0 (0 %) | 0 (0 %) | 0 (0 %) |  |
| Previous treatment with metronidazole | 0 (0 %) | 0 (0 %) | 0 (0 %) | 0 (0 %) |  |
| Previous treatment with vancomycin | 0 (0 %) | 0 (0 %) | 0 (0 %) | 0 (0 %) |  |
| Previous treatment with fidaxomicin | 0 (0 %) | 0 (0 %) | 0 (0 %) | 0 (0 %) |  |
| Ribotype 027 | 0 (0 %) | 0 (0 %) | 0 (0 %) | 0 (0 %) |  |
| Hospital admission at inclusion | 0 (0 %) | 0 (0 %) | 0 (0 %) | 0 (0 %) |  |
| Intensive care admission <1 mo before inclusion | 0 (0 %) | 0 (0 %) | 0 (0 %) | 0 (0 %) |  |
| Liquid stools per 24 h | 0 (0 %) | 0 (0 %) | 0 (0 %) | 0 (0 %) |  |
| Duration of symptoms current CDI (d), median (range) | 0 (0 %) | 0 (0 %) | 0 (0 %) | 0 (0 %) |  |
| Duration since onset of first CDI (d), median (range) | 0 (0 %) | 0 (0 %) | 0 (0 %) | 0 (0 %) |  |
| **Outcome variables for health-related quality of life** | | | | | |
| Baseline movement | 0 (0 %) | 0 (0 %) | 0 (0 %) | 0 (0 %) |  |
| Baseline personal care | 0 (0 %) | 0 (0 %) | 0 (0 %) | 0 (0 %) |  |
| Baseline activities | 0 (0 %) | 0 (0 %) | 0 (0 %) | 0 (0 %) |  |
| Baseline pain | 1 (4.2 %) | 0 (0 %) | 0 (0 %) | 0 (0 %) |  |
| Baseline anxiety and depression | 0 (0 %) | 0 (0 %) | 0 (0 %) | 0 (0 %) |  |
| Baseline EQ-5D-3L index score | 1 (4.2 %) | 0 (0 %) | 0 (0 %) | 1 (1.6 %) | X |
| Baseline EQ-VAS | 0 (0 %) | 1 (4.2 %) | 0 (0 %) | 1 (1.6 %) | X |
| Week 8 movement | 1 (4.2 %) | 3 (12.5 %) | 4 (25.0 %) | 8 (12.5 %) |  |
| Week 8 personal care | 1 (4.2 %) | 3 (12.5 %) | 4 (25.0 %) | 8 (12.5 %) |  |
| Week 8 activities | 1 (4.2 %) | 3 (12.5 %) | 4 (25.0 %) | 8 (12.5 %) |  |
| Week 8 pain | 1 (4.2 %) | 3 (12.5 %) | 4 (25.0 %) | 8 (12.5 %) |  |
| Week 8 anxiety and depression | 1 (4.2 %) | 3 (12.5 %) | 4 (25.0 %) | 8 (12.5 %) |  |
| Week 8 EQ-5D-3L index score | 1 (4.2 %) | 3 (12.5 %) | 4 (25.0 %) | 8 (12.5 %) | X |
| EQ-VAS week 8 | 2 (8.3 %) | 3 (12.5 %) | 4 (25.0 %) | 9 (14.1 %) | X |
| Week 26 movement | 5 (20.8 %) | 2 (8.3 %) | 5 (31.3 %) | 12 (18.8 %) |  |
| Week 26 personal care | 5 (20.8 %) | 2 (8.3 %) | 5 (31.3 %) | 12 (18.8 %) |  |
| Week 26 activities | 5 (20.8 %) | 2 (8.3 %) | 5 (31.3 %) | 12 (18.8 %) |  |
| Week 26 pain | 5 (20.8 %) | 2 (8.3 %) | 5 (31.3 %) | 12 (18.8 %) |  |
| Week 26 anxiety and depression | 5 (20.8 %) | 3 (12.5 %) | 5 (31.3 %) | 13 (20.3 %) |  |
| Week 26 EQ-5D-3L index score | 5 (20.8 %) | 3 (12.5 %) | 5 (31.3 %) | 13 (20.3 %) | X |
| EQ-VAS week 26 | 5 (20.8 %) | 2 (8.3 %) | 5 (31.3 %) | 12 (18.8 %) | X |

**Table 2.** Syntax (STATA) for multiple imputations

| *mi impute chained (pmm, knn(3)) q0_index q0_qofscore q8_index q8_qofscore q26_index q26_qofscore = ageyrs b1_gender b1_who b1_cdicount, add(40) by(b1_treatmentarm) rseed(25896)* |
| --- |
